# Supplementary material for: SIRT1-dependent epigenetic regulation of H3 and H4 histone acetylation in human breast cancer
Source: PubMed Central journal article supplement (PMC6078139; doi:10.18632/oncotarget.25771), 2018-07-17
Supplement: oncotarget-09-30661-s001.pdf [file oncotarget-09-30661-s001.pdf]

## SIRT1-dependent epigenetic regulation of H3 and H4 histone acetylation in human breast cancer

### SUPPLEMENTARY MATERIALS

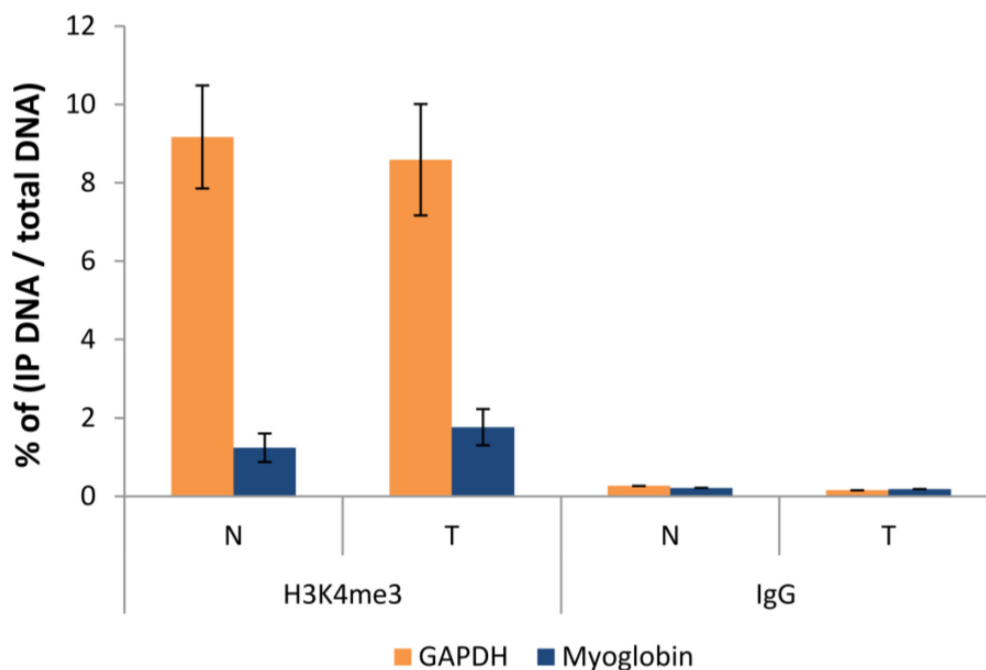

**Supplementary Figure 1: Control of ChIP analysis performed on breast tumors and matched normal tissues.** ChIP assays were performed on chromatin extracted from breast tumors and matched normal tissues. The assays were carried out using a positive control anti-H3K4me3 Ab and a negative control non-immune anti-IgG Ab (Diagenode). The efficiency of ChIP was calculated by real time quantitative PCR using the primers of 2 control genes: positive control *GAPDH* and negative control *Myoglobin*. Data are the average of 3 independent experiments and represented as means  $\pm$  S.D. N: Normal, T: Tumor.

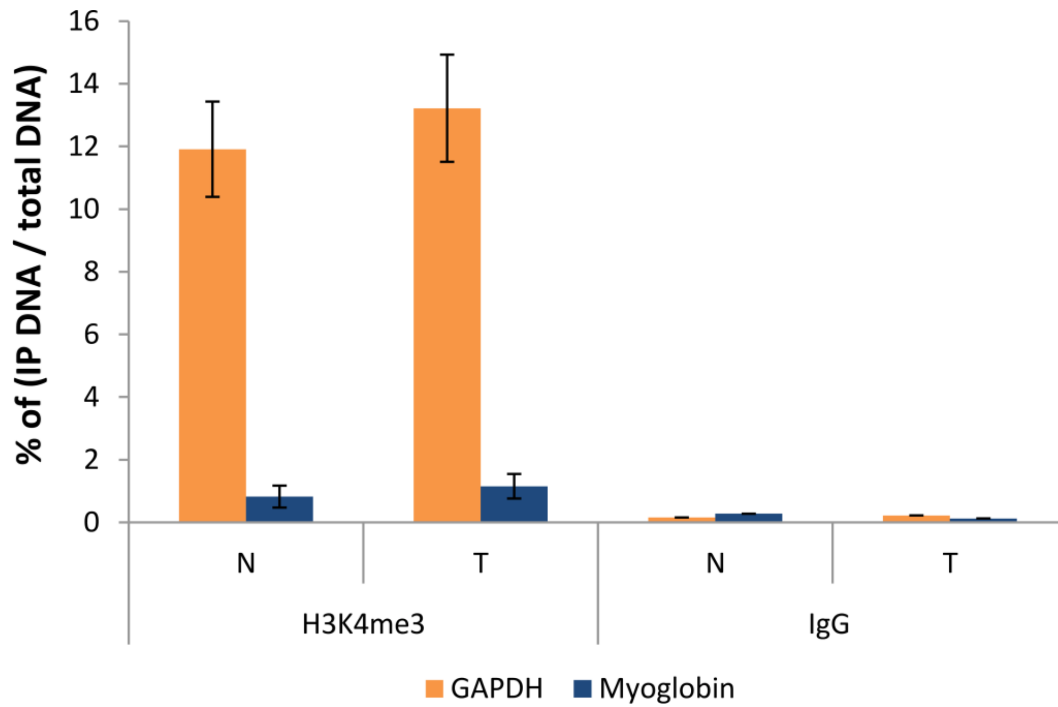

**Supplementary Figure 2: Control of ChIP analysis performed on breast tumors and matched normal tissues.** ChIP assays were performed on chromatin extracted from breast tumors and matched normal tissues. The assays were carried out using a positive control anti-H3K4me3 Ab and a negative control non-immune anti-IgG Ab (Diagenode). The efficiency of ChIP was calculated by real time quantitative PCR using the primers of 2 control genes: positive control *GAPDH* and negative control *Myoglobin*. Data are the average of 5 independent experiments and represented as means  $\pm$  S.D. N: Normal, T: Tumor.
